# Supplementary material for: Comparison of Objective and Perceived Access to Food Stores Associated with Intake Frequencies of Vegetables/Fruits and Meat/Fish among Community-Dwelling Older Japanese
Source: MDPI journal article supplement (doi:10.3390/ijerph16050772), 2019-03-03
Supplement: s1 [file s1]

## Additional file 1

**Table S1** Characteristics of participants by objective and perceived access in urban/suburban areas

|                                                   | Total <sup>a</sup><br>n = 60576 | Poor<br>objective access<br>n = 11107 | Poor<br>perceived access<br>n = 13044 |
|---------------------------------------------------|---------------------------------|---------------------------------------|---------------------------------------|
| Objective access: poor, n (%)                     | 11107                           | -                                     | 3385 (26.0)                           |
| Perceived access: poor, n (%)                     | 13044                           | 3385 (30.5)                           | -                                     |
| Age (years), mean (SD)                            | 73.6 (6.0)                      | 73.7 (6.2)                            | 73.7 (6.3)                            |
| Men, n (%)                                        | 28472                           | 5093 (45.9)                           | 5614 (43.0)                           |
| <b>Family structure, n (%)</b>                    |                                 |                                       |                                       |
| Alone                                             | 7198                            | 1136 (10.3)                           | 1749 (13.4)                           |
| With their spouse                                 | 23166                           | 4068 (36.6)                           | 4632 (35.5)                           |
| With others                                       | 29436                           | 5762 (51.9)                           | 6480 (49.7)                           |
| Unknown                                           | 776                             | 141 (1.3)                             | 183 (1.4)                             |
| <b>Marital status, n (%)</b>                      |                                 |                                       |                                       |
| Married                                           | 43476                           | 7919 (71.3)                           | 8843 (67.8)                           |
| Divorced or widowed                               | 14743                           | 2803 (26.6)                           | 3644 (27.9)                           |
| Never married or others                           | 1570                            | 208 (1.9)                             | 377 (2.9)                             |
| Unknown                                           | 787                             | 177 (1.6)                             | 180 (1.4)                             |
| <b>Body mass index (kg/m<sup>2</sup>), n (%)</b>  |                                 |                                       |                                       |
| < 18.5                                            | 4221                            | 692 (6.2)                             | 991 (7.6)                             |
| 18.5–24.9                                         | 41537                           | 7534 (67.8)                           | 8800 (67.5)                           |
| ≥ 25                                              | 12690                           | 2420 (21.8)                           | 2717 (20.8)                           |
| Unknown                                           | 2128                            | 461 (4.2)                             | 536 (4.1)                             |
| <b>Activity daily living (units), n (%)</b>       |                                 |                                       |                                       |
| < 5                                               | 11888                           | 2244 (20.2)                           | 2985 (22.9)                           |
| ≥ 5                                               | 47417                           | 8614 (77.6)                           | 9754 (74.8)                           |
| Unknown                                           | 1271                            | 249 (2.2)                             | 305 (2.3)                             |
| <b>Remaining teeth (number), n (%)</b>            |                                 |                                       |                                       |
| < 20                                              | 37330                           | 7184 (64.7)                           | 8313 (63.7)                           |
| ≥ 20                                              | 22186                           | 3748 (33.7)                           | 4499 (34.5)                           |
| Unknown                                           | 1060                            | 175 (1.6)                             | 232 (1.8)                             |
| <b>Comorbidity, n (%)</b>                         |                                 |                                       |                                       |
| No                                                | 8303                            | 1424 (12.8)                           | 1843 (14.1)                           |
| Yes                                               | 37707                           | 7050 (63.5)                           | 8326 (63.8)                           |
| Unknown                                           | 14566                           | 2633 (23.7)                           | 2875 (22.0)                           |
| <b>Smoking status</b>                             |                                 |                                       |                                       |
| Current                                           | 6553                            | 1169 (10.5)                           | 1426 (10.9)                           |
| Past or never                                     | 50996                           | 9243 (83.2)                           | 10890 (83.5)                          |
| Unknown                                           | 3027                            | 695 (6.3)                             | 728 (5.6)                             |
| <b>Household income (million yen/year), n (%)</b> |                                 |                                       |                                       |
| < 2.00                                            | 23772                           | 4613 (41.5)                           | 5323 (40.8)                           |
| 2.00–3.99                                         | 20885                           | 3700 (33.3)                           | 4234 (32.5)                           |
| ≥ 4.00                                            | 6156                            | 874 (7.9)                             | 1240 (9.5)                            |
| Unknown                                           | 9763                            | 1920 (17.3)                           | 2247 (17.0)                           |
| <b>Years of schooling (years), n (%)</b>          |                                 |                                       |                                       |
| ≤ 9                                               | 26225                           | 4900 (44.1)                           | 5950 (45.6)                           |
| 10–12                                             | 21632                           | 4092 (36.8)                           | 4573 (35.1)                           |
| ≥ 13                                              | 11441                           | 1901 (17.1)                           | 2220 (17.2)                           |
| Unknown                                           | 1278                            | 214 (1.9)                             | 301 (2.3)                             |
| <b>Car use, n (%)</b>                             |                                 |                                       |                                       |
| Yes                                               | 42168                           | 9408 (84.7)                           | 9358 (71.7)                           |
| No                                                | 9868                            | 1495 (13.5)                           | 2105 (16.1)                           |
| Unknown                                           | 8540                            | 204 (1.8)                             | 1581 (12.1)                           |
| <b>Community level</b>                            |                                 |                                       |                                       |
| Convenience stores (number), mean (SD)            | 3.7 (2.0)                       | 3.7 (2.0)                             | 4.2 (3.1)                             |
| Land slope (degree), mean (SD)                    | 2.8 (3.8)                       | 5.7 (5.6)                             | 3.1 (4.0)                             |
| Vegetables/fruits intake (times/day), mean (SD)   | 1.4 (0.6)                       | 1.4 (0.6)                             | 1.3 (0.6)                             |
| Meat/fish intake (times/day), mean (SD)           | 0.8 (0.5)                       | 0.8 (0.5)                             | 0.7 (0.5)                             |

SD = standard deviation; <sup>a</sup> Numbers or mean (SD) were indicated in Total.

## Additional file 1

**Table S2** Characteristics of participants by objective and perceived access in rural areas

|                                                   | Total <sup>a</sup><br>n = 22808 | Poor<br>objective access<br>n = 19276 | Poor<br>perceived access<br>n = 8061 |
|---------------------------------------------------|---------------------------------|---------------------------------------|--------------------------------------|
| Objective access: poor, n (%)                     | 19276                           | -                                     | 7311 (90.7)                          |
| Perceived access: poor, n (%)                     | 8061                            | 7311 (37.9)                           | -                                    |
| Age (years), mean (SD)                            | 74.8 (6.5)                      | 75.0 (6.5)                            | 75.1 (6.5)                           |
| Men, n (%)                                        | 10143                           | 8511 (44.2)                           | 3340 (41.4)                          |
| <b>Family structure, n (%)</b>                    |                                 |                                       |                                      |
| Alone                                             | 2698                            | 2377 (12.3)                           | 1100 (13.7)                          |
| With their spouse                                 | 7985                            | 6808 (35.3)                           | 2831 (35.1)                          |
| With others                                       | 11703                           | 9723 (50.4)                           | 3976 (49.3)                          |
| Unknown                                           | 422                             | 368 (1.9)                             | 154 (1.9)                            |
| <b>Marital status, n (%)</b>                      |                                 |                                       |                                      |
| Married                                           | 15837                           | 13308 (69.0)                          | 5356 (66.4)                          |
| Divorced or widowed                               | 5997                            | 5123 (25.8)                           | 2361 (29.3)                          |
| Never married or others                           | 466                             | 408 (2.1)                             | 167 (2.1)                            |
| Unknown                                           | 508                             | 437 (2.3)                             | 177 (2.2)                            |
| <b>Body mass index (kg/m<sup>2</sup>), n (%)</b>  |                                 |                                       |                                      |
| < 18.5                                            | 1538                            | 1295 (6.7)                            | 565 (7.0)                            |
| 18.5–24.9                                         | 15134                           | 12782 (66.3)                          | 5338 (66.2)                          |
| ≥ 25                                              | 4892                            | 4152 (21.5)                           | 1679 (20.8)                          |
| Unknown                                           | 1244                            | 1047 (5.4)                            | 479 (5.9)                            |
| <b>Activity daily living (units), n (%)</b>       |                                 |                                       |                                      |
| < 5                                               | 5038                            | 4186 (21.7)                           | 1959 (24.3)                          |
| ≥ 5                                               | 17036                           | 14457 (75.0)                          | 5823 (72.2)                          |
| Unknown                                           | 734                             | 633 (3.3)                             | 279 (3.5)                            |
| <b>Remaining teeth (number), n (%)</b>            |                                 |                                       |                                      |
| < 20                                              | 16908                           | 14513 (75.3)                          | 6094 (75.6)                          |
| ≥ 20                                              | 5349                            | 4292 (22.3)                           | 1768 (21.9)                          |
| Unknown                                           | 551                             | 471 (2.4)                             | 199 (2.5)                            |
| <b>Comorbidity, n (%)</b>                         |                                 |                                       |                                      |
| No                                                | 3188                            | 2683 (13.9)                           | 1209 (15.0)                          |
| Yes                                               | 14342                           | 12156 (63.1)                          | 5083 (63.1)                          |
| Unknown                                           | 5278                            | 4437 (23.0)                           | 1769 (22.0)                          |
| <b>Smoking status</b>                             |                                 |                                       |                                      |
| Current                                           | 2182                            | 1808 (9.4)                            | 699 (8.7)                            |
| Past or never                                     | 18664                           | 15798 (82.0)                          | 6606 (82.0)                          |
| Unknown                                           | 1962                            | 1670 (8.7)                            | 756 (9.4)                            |
| <b>Household income (million yen/year), n (%)</b> |                                 |                                       |                                      |
| < 2.00                                            | 10709                           | 9274 (48.1)                           | 3943 (48.9)                          |
| 2.00–3.99                                         | 5782                            | 4742 (24.6)                           | 1902 (23.6)                          |
| ≥ 4.00                                            | 1493                            | 1174 (6.1)                            | 429 (5.3)                            |
| Unknown                                           | 4824                            | 4086 (21.2)                           | 1787 (22.2)                          |
| <b>Years of schooling (years), n (%)</b>          |                                 |                                       |                                      |
| ≤ 9                                               | 12409                           | 10325 (53.6)                          | 4386 (54.4)                          |
| 10–12                                             | 6925                            | 5966 (31.0)                           | 2439 (30.3)                          |
| ≥ 13                                              | 2826                            | 2427 (12.6)                           | 981 (12.2)                           |
| Unknown                                           | 648                             | 558 (2.9)                             | 255 (3.2)                            |
| <b>Car use, n (%)</b>                             |                                 |                                       |                                      |
| Yes                                               | 19757                           | 16717 (86.7)                          | 6912 (85.8)                          |
| No                                                | 2682                            | 2234 (11.6)                           | 994 (12.3)                           |
| Unknown                                           | 369                             | 325 (1.7)                             | 155 (1.9)                            |
| <b>Community level</b>                            |                                 |                                       |                                      |
| Convenience stores (number), mean (SD)            | 1.6 (1.7)                       | 1.5 (1.8)                             | 1.0 (1.3)                            |
| Land slope (degree), mean (SD)                    | 10.3 (6.9)                      | 11.5 (6.8)                            | 12.5 (7.4)                           |
| Vegetables/fruits intake (times/day), mean (SD)   | 1.4 (0.6)                       | 1.4 (0.6)                             | 1.4 (0.6)                            |
| Meat/fish intake (times/day), mean (SD)           | 0.7 (0.5)                       | 0.8 (0.5)                             | 0.7 (0.5)                            |

SD = standard deviation; <sup>a</sup>Numbers or mean (SD) were indicated in Total.

## Additional file 1

**Table S3** Suburban/urban area intake frequencies of vegetables/fruits and meat/fish according to objective and perceived access

|                                                           | Objective access |                 | Perceived access |                 |
|-----------------------------------------------------------|------------------|-----------------|------------------|-----------------|
|                                                           | $\beta$ (SE)     | <i>p</i> -Value | $\beta$ (SE)     | <i>p</i> -Value |
| <b>Vegetables/fruits</b>                                  |                  |                 |                  |                 |
| Poor access (vs. good access)                             | 0.102 (0.021)    | <0.001          | -0.112 (0.011)   | <0.001          |
| Age                                                       | 0.018 (0.001)    | <0.001          | 0.018 (0.001)    | <0.001          |
| Men (vs. women)                                           | -0.403 (0.010)   | <0.001          | -0.407 (0.010)   | <0.001          |
| Living alone (vs. with others)                            | 0.059 (0.017)    | <0.001          | 0.060 (0.017)    | <0.001          |
| Never married or others (vs. married)                     | -0.186 (0.030)   | <0.001          | -0.183 (0.029)   | <0.001          |
| <b>BMI (vs. 18.5–24.9 kg/m<sup>2</sup>)</b>               |                  |                 |                  |                 |
| < 18.5                                                    | -0.001 (0.018)   | 0.971           | 0.001 (0.018)    | 0.969           |
| ≥ 25                                                      | -0.107 (0.011)   | <0.001          | -0.108 (0.011)   | <0.001          |
| Activity daily living, < 5 units (vs. ≥ 5)                | -0.125 (0.012)   | <0.001          | -0.119 (0.012)   | <0.001          |
| Remaining teeth, < 20 tooth (vs. ≥20)                     | -0.230 (0.010)   | <0.001          | -0.228 (0.010)   | <0.001          |
| Comorbidity, yes (vs. no)                                 | -0.026 (0.013)   | 0.053           | -0.026 (0.013)   | 0.051           |
| Current smoking (vs. never)                               | -0.242 (0.014)   | <0.001          | -0.240 (0.014)   | <0.001          |
| Household income, < 2.00 million yen/year (vs. 2.00–3.99) | -0.187 (0.011)   | <0.001          | -0.185 (0.011)   | <0.001          |
| Years of schooling, < 9 years (vs. 10–12)                 | -0.144 (0.010)   | <0.001          | -0.143 (0.010)   | <0.001          |
| No car-use (vs. use)                                      | -0.124 (0.013)   | <0.001          | -0.128 (0.013)   | <0.001          |
| Convenience store                                         | -0.002 (0.002)   | 0.247           | -0.003 (0.002)   | 0.123           |
| Land slope                                                | -0.006 (0.002)   | 0.001           | -0.004 (0.002)   | 0.084           |
|                                                           | Var RE (SE)      | ICC (SE)        | Var RE (SE)      | ICC (SE)        |
|                                                           | 0.005 (0.001)    | 0.006 (0.001)   | 0.008 (0.001)    | 0.008 (0.001)   |
| <b>Meat/fish</b>                                          |                  |                 |                  |                 |
| Poor access (vs. good access)                             | 0.019 (0.015)    | 0.194           | -0.034 (0.005)   | <0.001          |
| Age                                                       | 0.005 (0.0004)   | <0.001          | 0.005 (0.0004)   | <0.001          |
| Men (vs. women)                                           | -0.086 (0.005)   | <0.001          | -0.088 (0.005)   | <0.001          |
| Living alone (vs. with others)                            | -0.017 (0.008)   | 0.029           | -0.017 (0.008)   | 0.031           |
| Never married or others (vs. married)                     | -0.063 (0.014)   | <0.001          | -0.062 (0.014)   | <0.001          |
| <b>BMI (vs. 18.5–24.9 kg/m<sup>2</sup>)</b>               |                  |                 |                  |                 |
| < 18.5                                                    | 0.005 (0.008)    | 0.578           | 0.005 (0.008)    | 0.540           |
| ≥ 25                                                      | -0.022 (0.005)   | <0.001          | -0.023 (0.005)   | <0.001          |
| Activity daily living, < 5 units (vs. ≥ 5)                | -0.041 (0.005)   | <0.001          | -0.039 (0.005)   | <0.001          |
| Remaining teeth, < 20 tooth (vs. ≥ 20)                    | -0.087 (0.004)   | <0.001          | -0.087 (0.004)   | <0.001          |
| Comorbidity, yes (vs. no)                                 | -0.010 (0.006)   | 0.084           | 0.011 (0.006)    | 0.082           |
| Current smoking (vs. never)                               | -0.013 (0.007)   | 0.062           | -0.012 (0.007)   | 0.070           |
| Household income, < 2.00 million yen/year (vs. 2.00–3.99) | -0.078 (0.005)   | <0.001          | -0.078 (0.005)   | <0.001          |
| Years of schooling, < 9 years (vs. 10–12)                 | -0.086 (0.005)   | <0.001          | -0.086 (0.005)   | <0.001          |
| No car-use (vs. use)                                      | -0.011 (0.006)   | 0.062           | -0.012 (0.006)   | 0.047           |
| Convenience store                                         | -0.0002 (0.001)  | 0.887           | -0.0003 (0.001)  | 0.805           |
| Land slope                                                | 0.001 (0.001)    | 0.443           | 0.002 (0.001)    | 0.213           |
|                                                           | Var RE (SE)      | ICC (SE)        | Var RE (SE)      | ICC (SE)        |
|                                                           | 0.004 (0.0004)   | 0.016 (0.002)   | 0.004 (0.0004)   | 0.016 (0.002)   |

Associations were assessed using a multilevel Tobit model<sup>†</sup> among 60,576 residents in urban/suburban areas.  $\beta$ , beta coefficients; SE, standard error; Var RE, random effect variance in 336 school districts in urban/suburban areas; ICC, intercorrelation between school districts.

<sup>†</sup>Var RE (SE) and ICC (SE) in the null model was 0.012 (0.002) and 0.011 (0.002) for vegetables/fruits and 0.006 (0.001) and 0.023 (0.002) for meat/fish, respectively

**Additional file 1**

**Table S4** Rural area intake frequencies of vegetables/fruits and meat/fish according to objective and perceived access

|                                                           | Objective access |                 | Perceived access |                 |
|-----------------------------------------------------------|------------------|-----------------|------------------|-----------------|
|                                                           | $\beta$ (SE)     | <i>p</i> -Value | $\beta$ (SE)     | <i>p</i> Vvalue |
| <b>Vegetables/fruits</b>                                  |                  |                 |                  |                 |
| Poor access (vs. good access)                             | 0.052 (0.053)    | 0.323           | -0.053 (0.016)   | 0.001           |
| Age                                                       | 0.017 (0.001)    | <0.001          | 0.017 (0.001)    | <0.001          |
| Men (vs. women)                                           | -0.303 (0.017)   | <0.001          | -0.305 (0.017)   | <0.001          |
| Living alone (vs. with others)                            | -0.008 (0.027)   | 0.771           | -0.007 (0.027)   | 0.801           |
| Never married or others (vs. married)                     | -0.191 (0.053)   | <0.001          | -0.190 (0.053)   | <0.001          |
| <b>BMI (vs. 18.5–24.9 kg/m<sup>2</sup>)</b>               |                  |                 |                  |                 |
| < 18.5                                                    | -0.039 (0.030)   | 0.190           | -0.039 (0.030)   | 0.191           |
| ≥ 25                                                      | -0.064 (0.018)   | <0.001          | -0.064 (0.018)   | <0.001          |
| Activity daily living, < 5 units (vs. ≥ 5)                | -0.162 (0.018)   | <0.001          | -0.158 (0.018)   | <0.001          |
| Remaining teeth, < 20 tooth (vs. ≥20)                     | -0.164 (0.018)   | <0.001          | -0.163 (0.018)   | <0.001          |
| Comorbidity, yes (vs. no)                                 | -0.028 (0.022)   | 0.196           | -0.029 (0.022)   | 0.181           |
| Current smoking (vs. never)                               | -0.247 (0.025)   | <0.001          | -0.248 (0.025)   | <0.001          |
| Household income, < 2.00 million yen/year (vs. 2.00–3.99) | -0.134 (0.019)   | <0.001          | -0.133 (0.019)   | <0.001          |
| Years of schooling, < 9 years (vs. 10–12)                 | -0.104 (0.017)   | <0.001          | -0.104 (0.017)   | <0.001          |
| No car-use (vs. use)                                      | -0.151 (0.024)   | <0.001          | -0.150 (0.024)   | <0.001          |
| Convenience store                                         | 0.006 (0.012)    | 0.635           | 0.003 (0.012)    | 0.840           |
| Land slope                                                | 0.004 (0.003)    | 0.150           | 0.005 (0.002)    | 0.029           |
|                                                           | Var RE (SE)      | ICC (SE)        | Var RE (SE)      | ICC (SE)        |
|                                                           | 0.016 (0.004)    | 0.015 (0.003)   | 0.017 (0.004)    | 0.016 (0.004)   |
| <b>Meat/fish</b>                                          |                  |                 |                  |                 |
| Poor access (vs. good access)                             | 0.035 (0.033)    | 0.288           | -0.020 (0.007)   | 0.007           |
| Age                                                       | 0.005 (0.001)    | <0.001          | 0.005 (0.001)    | <0.001          |
| Men (vs. women)                                           | -0.047 (0.007)   | <0.001          | -0.047 (0.007)   | <0.001          |
| Living alone (vs. with others)                            | -0.045 (0.012)   | <0.001          | -0.045 (0.012)   | 0.031           |
| Never married or others (vs. married)                     | -0.046 (0.024)   | 0.054           | -0.046 (0.024)   | 0.056           |
| <b>BMI (vs. 18.5–24.9 kg/m<sup>2</sup>)</b>               |                  |                 |                  |                 |
| < 18.5                                                    | 0.005 (0.013)    | 0.714           | 0.005 (0.013)    | 0.713           |
| ≥ 25                                                      | -0.011 (0.008)   | 0.165           | -0.011 (0.008)   | 0.158           |
| Activity daily living, < 5 units (vs. ≥ 5)                | -0.042 (0.008)   | <0.001          | -0.041 (0.008)   | <0.001          |
| Remaining teeth, < 20 tooth (vs. ≥ 20)                    | -0.063 (0.008)   | <0.001          | -0.063 (0.008)   | <0.001          |
| Comorbidity, yes (vs. no)                                 | 0.0003 (0.010)   | 0.971           | -0.00002 (0.010) | 0.998           |
| Current smoking (vs. never)                               | -0.017 (0.012)   | 0.146           | -0.017 (0.012)   | 0.139           |
| Household income, < 2.00 million yen/year (vs. 2.00–3.99) | -0.083 (0.008)   | <0.001          | -0.083 (0.008)   | <0.001          |
| Years of schooling, < 9 years (vs. 10–12)                 | -0.071 (0.008)   | <0.001          | -0.071 (0.008)   | <0.001          |
| No car-use (vs. use)                                      | -0.044 (0.011)   | <0.001          | -0.044 (0.011)   | <0.001          |
| Convenience store                                         | -0.012 (0.007)   | 0.110           | -0.013 (0.008)   | 0.076           |
| Land slope                                                | 0.001 (0.002)    | 0.648           | 0.002 (0.001)    | 0.291           |
|                                                           | Var RE (SE)      | ICC (SE)        | Var RE (SE)      | ICC (SE)        |
|                                                           | 0.007 (0.001)    | 0.029 (0.006)   | 0.007 (0.002)    | 0.030 (0.006)   |

Associations were assessed using a multilevel Tobit model<sup>†</sup> among 22,808 residents in rural areas.

$\beta$ , beta coefficients; SE, standard error; Var RE, random effect variance in 78 school districts in rural areas; ICC, intercorrelation between school districts.

<sup>†</sup>Var RE (SE) and ICC (SE) in the null model was 0.026 (0.005) and 0.023 (0.004) for vegetables/fruits and 0.006 (0.001) and 0.025 (0.005) for meat/fish, respectively

**Additional file 1****Table S5** Evaluation of the association of food access with the prevalence of underweight and overweight individuals compared to those with a normal weight

|                         | <b>Good</b>        | <b>Poor</b>        |                   |                    |                 |
|-------------------------|--------------------|--------------------|-------------------|--------------------|-----------------|
|                         | <b>Case, n (%)</b> | <b>Case, n (%)</b> | <b>OR (95%CI)</b> | <b>Var RE (SE)</b> | <b>ICC (SE)</b> |
| <b>Objective access</b> |                    |                    |                   |                    |                 |
| Underweight             | 3772 (9.4)         | 1987 (8.9)         | 0.88 (0.81, 0.97) | 0.011 (0.005)      | 0.003 (0.002)   |
| Overweight              | 11010 (23.3)       | 6572 (24.4)        | 1.05 (0.98, 1.14) | 0.021 (0.004)      | 0.006 (0.001)   |
| <b>Perceived access</b> |                    |                    |                   |                    |                 |
| Underweight             | 4203 (9.0)         | 1556 (9.9)         | 1.06 (0.99, 1.13) | 0.013 (0.006)      | 0.004 (0.002)   |
| Overweight              | 13186 (23.7)       | 4396 (23.7)        | 0.97 (0.93, 1.02) | 0.021 (0.004)      | 0.006 (0.001)   |

OR = odds ratio; CI = confidence interval; Var RE = random effect variance in 426 school districts; SE = standard error; ICC = intercorrelation between the school districts; Underweight, normal weight, and overweight were defined by body mass index < 18.5, 18.5–24.9, and ≥ 25 kg/m<sup>2</sup>, respectively; In the null model, the Var RE (SE) and ICC (SE) was 0.015 (0.006) and 0.005 (0.002) for underweight and 0.031 (0.005) and 0.009 (0.015) for overweight; The association was evaluated using a multilevel logistic regression model adjusted for age, sex, family structure, marital status, activity daily living, remaining teeth, comorbidity, smoking status, household income, years of schooling, car use, urban/suburban area, convenience stores, and land slope among 80,012 residents.

**Additional file 1**

**Table S6** Evaluation of the association of intake frequencies of vegetables/fruits and meat/fish with body mass index

|                 | Vegetables/fruits |                 |               |               | Meat/fish      |                 |               |               |
|-----------------|-------------------|-----------------|---------------|---------------|----------------|-----------------|---------------|---------------|
|                 | $\beta$ (SE)      | <i>p</i> -value | Var RE (SE)   | ICC (SE)      | $\beta$ (SE)   | <i>p</i> -value | Var RE (SE)   | ICC (SE)      |
| Body mass index | -0.006 (0.001)    | <0.001          | 0.070 (0.004) | 0.014 (0.002) | -0.004 (0.001) | <0.001          | 0.074 (0.003) | 0.025 (0.002) |

$\beta$  = beta coefficients; SE = standard error; Var RE = random effect variance in 426 school districts; ICC = intercorrelation between school districts; In the null model, the Var RE (SE) and ICC (SE) was 0.069 (0.004) and 0.013 (0.001) for vegetables/fruits and 0.074 (0.003) and 0.025 (0.002) for overweight; The association was evaluated using a multilevel regression model adjusted for age and sex among 80,012 residents.
